# Supplementary material for: Evaluation of canine prostate volume in calculated tomographic images - comparison of two assessment methods
Source: BMC Vet Res. 2019 Oct 22;15:361. doi: 10.1186/s12917-019-2106-3 (PMC6806524; doi:10.1186/s12917-019-2106-3)
Supplement: Supplementary file 1 — Additional file 1. The table shows the patient data: sex (m = male, n=neutred), age and weight, as well as the the group affiliation for prostatic structure and volume. Results of prostatic volume measurements in 3 different methods are added. [file 12917_2019_2106_MOESM1_ESM.xls]

## Sheet: Tabelle1
Patient1	Sex1	Age (years)1	Weight (kg)1	Prostatic structure1	Volume group	Volume with Slice addition technique (cm³) 1	Volume with Wrap (cm³)	Volume with Formula (cm³)	Pixel size (mm * mm)1
#1	m	1.25	­	C	2	27.6088	28.1622	23.1237	0.44 * 0.44
#2	m	1.83333	31.9	C	3	41.8748	42.1519	28.3985	0.36 * 0.36
#3	m	1.83333	23	C	2	23.9386	23.8414	16.5828	0.36 * 0.36
#4	m	3.75	21.4	C	2	18.1341	18.9098	15.1414	0.84 * 0.84
#5	m	4.5	­	C	2	27.8957	29.4942	23.457	0.40 * 0.40
#6	m	4.58333	­	C	3	123.806	124.533	98.098	0.58 * 0.58
#7	m	4.66667	49	C	3	73.5419	79.4457	51.3321	0.30 * 0.30
#8	m	6.25	40.1	C	3	40.8593	40.7865	27.4823	0.54 * 0.54
#9	m	6.25	­	C	2	20.4544	22.4221	16.2574	0.31 * 0.31
#10	m	6.41667	49	C	3	52.184	48.2615	37.229	0.68 * 0.68
#11	m	6.66667	46.5	C	3	87.7945	86.767	70.1449	0.27 * 0.27
#12	m	6.91667	­	C	3	39.3883	43.7762	33.5938	0.53 * 0.53
#13	m	7.25	32	C	3	105.377	101.551	61.2899	0.63 * 0.63
#14	m	7.33333	45	C	3	97.5406	98.2924	73.2283	0.43 * 0.43
#15	m	7.5	33.4	C	3	38.582	41.2832	23.884	0.35 * 0.35
#16	m	7.66667	45.7	C	3	120.062	103.798	69.7731	0.57 * 0.57
#17	m	7.66667	­	C	3	898.628	936.163	391.848	0.52 * 0.52
#18	m	8.25	40.5	C	3	49.367	63.2767	45.5671	0.71 * 0.71
#19	m	8.41667	10.5	C	2	31.8824	31.5	23.2009	0.15 * 0.15
#20	m	8.83333	38.8	C	3	227.144	273.498	179.504	0.53 * 0.53
#21	m	9.25	­	C	3	64.0862	64.3822	42.8104	0.57 * 0.57
#22	m	9.33333	41.3	C	2	37.1488	36.211	30.0537	0.55 * 0.55
#23	m	9.33333	­	C	3	38.6362	39.5635	28.7617	0.56 * 0.56
#24	m	9.41667	25	C	3	38.5908	42.3712	30.1123	0.68 * 0.68
#25	m	9.5	14	C	2	17.2501	17.4604	9.48486	0.45 * 0.45
#26	m	9.5	­	C	2	20.9757	21.8527	14.5855	0.52 * 0.52
#27	m	9.58333	17.7	C	2	18.0189	19.2637	13.5853	0.45 * 0.45
#28	m	9.58333	34	C	3	44.7994	43.4953	39.7843	0.57 * 0.57
#29	m	10.1667	41.8	C	2	18.571	21.1056	17.8665	0.68 * 0.68
#30	m	10.25	42.5	C	3	1600.53	1579.23	1319.76	0.53 * 0.53
#31	m	10.25	­	C	3	60.3183	55.7248	37.9359	0.59 * 0.59
#32	m	10.4167	­	C	3	73.7622	73.3066	59.9385	0.56 * 0.56
#33	m	10.6667	14.3	C	2	25.123	25.8848	15.4954	0.52 * 0.52
#34	m	11.0833	­	C	3	134.363	131.283	63.7791	0.48 * 0.48
#35	m	11.1667	­	C	3	117.851	119.265	99.5237	0.51 * 0.51
#36	m	11.5	5.5	C	2	12.2013	13.3267	11.1233	0.43 * 0.43
#37	m	11.6667	­	C	3	274.837	257.037	155.033	0.27 * 0.27
#38	m	11.75	­	C	2	27.3204	29.736	23.4783	0.59 * 0.59
#39	m	11.8333	­	C	2	23.5656	24.0915	15.7004	0.37 * 0.37
#40	m	11.9167	­	C	2	19.56	19.3923	11.82	0.36 * 0.36
#41	m	12.5833	29.4	C	3	146.673	156.495	113.074	0.59 * 0.59
#42	m	12.6667	9.7	C	2	22.4804	21.8501	18.5726	0.41 * 0.41
#43	m	13.25	7.9	C	2	17.0376	17.7261	15.6396	0.34 * 0.34
#44	m	0.666667	­	H	1	3.44915	3.93053	2.58479	0.40 * 0.40
#45	m	1.33333	6.8	H	1	5.33778	5.35848	3.15225	0.24 * 0.24
#46	m	1.5	61.7	H	2	8.23306	11.6405	7.98598	0.60 * 0.60
#47	m	1.58333	5.2	H	1	2.43036	3.21288	2.21789	0.48 * 0.48
#48	m	1.66667	21.2	H	3	46.3629	46.9884	35.7985	0.60 * 0.60
#49	m	2.41667	­	H	2	22.7098	24.0949	16.7659	0.43 * 0.43
#50	m	2	­	I	2	14.954	15.3921	10.8888	0.46 * 0.46
#51	m	3	40	I	3	48.4292	48.7236	35.9521	0.58 * 0.58
#52	m	4.25	­	I	3	56.3887	57.7759	41.5815	0.52 * 0.52
#53	m	4.91667	33.3	I	3	50.6356	55.8149	37.3358	0.56 * 0.56
#54	m	5.33333	69.5	I	3	41.5205	43.3897	27.1555	0.41 * 0.41
#55	m	5.66667	7.8	I	2	7.58945	8.36238	5.44663	0.34 * 0.34
#56	m	6.5	43.8	I	3	39.8694	37.1868	30.8094	0.30 * 0.30
#57	m	7.58333	­	I	1	3.14439	3.83141	2.13642	0.31 * 0.31
#58	m	9.83333	­	I	1	5.64637	6.5309	3.78546	0.22 * 0.22
#59	n	6.58333	35.2	C	2	7.75804	9.40424	7.06452	0.37 * 0.37
#60	n	7.16667	10.6	C	2	35.1054	33.4481	33.0589	0.71 * 0.71
#61	n	7.91667	28	C	1	2.23559	3.52841	1.80712	0.43 * 0.43
#62	n	9.33333	­	C	1	2.99361	3.22398	1.70417	0.35 * 0.35
#63	n	10.1667	­	C	1	4.62103	5.51035	3.48199	0.44 * 0.44
#64	n	11.3333	45.8	C	2	15.8146	18.1491	10.1209	0.42 * 0.42
#65	n	12.3333	20.5	C	2	15.3917	16.0141	10.1357	0.35 * 0.35
#66	n	1.08333	31.5	H	1	1.6587	2.32035	1.26967	0.53 * 0.53
#67	n	2.83333	23.8	H	1	1.32541	2.08373	1.03931	0.29 * 0.29
#68	n	2.83333	54	H	1	5.0865	5.7427	4.54669	0.53 * 0.53
#69	n	3.66667	5.3	H	1	1.06081	1.7237	0.724334	0.36 * 0.36
#70	n	5	33.8	H	1	3.93359	4.52321	2.5616	0.50 * 0.50
#71	n	6	7.3	H	1	0.598708	1.24719	0.451737	0.34 * 0.34
#72	n	6.08333	25.5	H	1	4.31929	4.64027	2.1571	0.49 * 0.49
#73	n	7.58333	16.4	H	1	1.65876	2.32066	1.27695	0.34 * 0.34
#74	n	8	7	H	1	1.48736	2.08347	1.04101	0.35 * 0.35
#75	n	8.16667	10.3	H	1	2.29775	2.86821	1.48759	0.30 * 0.30
#76	n	8.33333	17.7	H	1	1.43456	2.67731	1.48954	0.22 * 0.22
#77	n	9	34.6	H	1	3.56709	4.68699	2.48475	0.48 * 0.48
#78	n	9.33333	50	H	1	5.97354	6.67314	4.37487	0.52 * 0.52
#79	n	9.91667	­	H	1	1.06431	1.68355	0.586409	0.27 * 0.27
#80	n	10.4167	­	H	1	4.0497	5.64045	2.72123	0.35 * 0.35
#81	n	11.1667	35.5	H	1	4.73399	4.37871	3.14446	0.34 * 0.34
#82	n	11.4167	10.4	H	1	2.67599	3.75893	2.08362	0.38 * 0.38
#83	n	12.5833	15.9	H	1	1.76887	2.25866	1.1487	0.29 * 0.29
#84	n	13.25	14	H	1	2.0831	2.42345	1.5079	0.40 * 0.40
#85	n	13.5	­	H	1	1.59843	1.9068	0.979361	0.43 * 0.43
#86	n	2.25	3.6	I	1	4.21855	4.97145	2.9378	0.31 * 0.31
#87	n	3.33333	29.6	I	1	4.80085	6.05982	3.64866	0.36 * 0.36
#88	n	6.5	43.4	I	2	6.3169	8.73787	6.79059	0.65 * 0.65
#89	n	7.33333	­	I	2	7.20429	7.09515	4.56918	0.36 * 0.36
#90	n	7.91667	33.7	I	2	13.911	16.0986	12.1667	0.48 * 0.48
#91	n	9.33333	8.6	I	1	1.29434	1.79182	0.68968	0.35 * 0.35
#92	n	9.58333	­	I	1	5.65656	6.69683	4.08905	0.54 * 0.54
#93	n	9.66667	40.5	I	2	10.6354	12.2365	7.05856	0.65 * 0.65
#94	n	10.25	32.9	I	2	7.28025	9.31885	6.02557	0.60 * 0.60
#95	n	12.0833	38.6	I	2	12.1464	12.2244	9.36271	0.37 * 0.37
1 Data recieved from previously published paper: Haverkamp, K., Harder, L. K., Kuhnt, N. S. M., Lüpke, M., Nolte, I., & Wefstaedt, P. (2019). Validation of canine prostate volumetric measurements in computed tomography determined by the slice addition technique using the Amira program. BMC veterinary research, 15(1), 49.
